# Supplementary material for: Quantifying the Intrinsic Strength of C–H⋯O Intermolecular Interactions
Source: MDPI journal article supplement (doi:10.3390/molecules28114478), 2023-05-31

Supplementary Materials to “Quantifying the Intrinsic Strength of C–H···O  
Intermolecular Interactions” by Czernek, Brus, Czerneková & Kobera  
(*Molecules* 2023)

Table S1. Data plotted in Figures 3 and 4.

| model of the C–H···O interaction (Fig. 3) |                                   | model of the O–H···O interaction (Fig. 4) |                                    |
|-------------------------------------------|-----------------------------------|-------------------------------------------|------------------------------------|
| <i>R</i><br>(in pm, rounded)              | $\Delta E$<br>(in J/mol, rounded) | <i>R</i><br>(in pm, rounded)              | $\Delta E$<br>(in kJ/mol, rounded) |
| 297                                       | –3209                             | 232                                       | –40169                             |
| 304                                       | –10012                            | 237                                       | –56390                             |
| 312                                       | –14593                            | 242                                       | –67697                             |
| 320                                       | –17456                            | 247                                       | –75783                             |
| 328                                       | –19013                            | 262                                       | –84302                             |
| 337                                       | –19592                            | 267                                       | –85781                             |
| 345                                       | –19484                            | 272                                       | –85949                             |
| 353                                       | –18887                            | 277                                       | –85097                             |
| 362                                       | –17981                            | 282                                       | –83472                             |
| 370                                       | –16872                            | 287                                       | –81281                             |
| 379                                       | –15635                            | 302                                       | –69539                             |
| 396                                       | –13230                            | 312                                       | –63090                             |
| 405                                       | –12054                            | 322                                       | –56808                             |
| 414                                       | –10948                            | 332                                       | –50879                             |
| 441                                       | –8078                             | 352                                       | –40456                             |
| 486                                       | –4756                             | 382                                       | –28497                             |
| 533                                       | –2767                             | 402                                       | –22617                             |
| 580                                       | –1584                             | 432                                       | –16213                             |
| 646                                       | –676                              | 462                                       | –11813                             |
| 772                                       | –32                               | 482                                       | –9673                              |
| 339 ( $R_{\min.}$ )                       | –19623                            | 269 ( $R_{\min.}$ )                       | –86213                             |
| 382 ( $R_{\text{infl.}}$ )                | –15169                            | 305 ( $R_{\text{infl.}}$ )                | –68116                             |

Table S2. Parameter values as obtained from the fits using Equation 3.

| model of the C–H...O interaction (Fig. 3) |                                  | model of the O–H...O interaction (Fig. 4) |                                  |
|-------------------------------------------|----------------------------------|-------------------------------------------|----------------------------------|
| parameter                                 | value                            | parameter                                 | value                            |
| $r_e$                                     | 3.39043328292679e+000<br>pm      | $r_e$                                     | 2.68604794773183e+000<br>pm      |
| $a_0$                                     | 523.886090663663e+000            | $a_0$                                     | 1.51172306772681e+003            |
| $a_1$                                     | –3.42441068460830e+000           | $a_1$                                     | –224.844260019574e–003           |
| $a_2$                                     | 3.46216907307006e+000            | $a_2$                                     | –9.65395289509222e+000           |
| $a_3$                                     | 3.85853134561235e+000            | $a_3$                                     | –35.5936125964515e+000           |
| $a_4$                                     | –11.8036418433260e+000           | $a_4$                                     | 350.263400321026e+000            |
| $a_5$                                     | 8.52097907943845e+000            | $a_5$                                     | –804.060973259444e+000           |
| $a_6$                                     | –1.13195550727040e+000           | $a_6$                                     | 605.364663753520e+000            |
| $V_e$                                     | –19.6225847619089e+000<br>kJ/mol | $V_e$                                     | –86.2134539138866e+000<br>kJ/mol |

six pages in total

Table S3. Raw data used to create Figures 5 and 6. All interaction energy terms are in kJ/mol. Shown in Figures 5 and 6 are:

$$E_{\text{elst}} = E_{\text{elst.}}^{\text{SAPT (1)}}; E_{\text{exch}} = E_{\text{exch.}}^{\text{SAPT (1)}}; E_{\text{ind}} = E_{\text{ind.}}^{\text{SAPT (2)}} + E_{\text{ind.-exch.}}^{\text{SAPT (2)}} + E_{\delta(\text{HF})}^{\text{SAPT}}; E_{\text{disp}} = E_{\text{disp.}}^{\text{SAPT (2)}} + E_{\text{disp.-exch.}}^{\text{SAPT (2)}}; E_{\text{total}} = E_{\text{elst}} + E_{\text{exch}} + E_{\text{ind}} + E_{\text{disp}};$$

and  $\Delta E(\text{CC})$ .

| interaction<br>energy<br>term              | model of the C–H...O interaction;<br><i>R</i> is specified right below (in pm) |                                     |          |         | model of the O–H...O interaction;<br><i>R</i> is specified right below (in pm) |                                     |          |          |
|--------------------------------------------|--------------------------------------------------------------------------------|-------------------------------------|----------|---------|--------------------------------------------------------------------------------|-------------------------------------|----------|----------|
|                                            | 320                                                                            | 339<br>( <i>R</i> <sub>min.</sub> ) | 379      | 441     | 247                                                                            | 269<br>( <i>R</i> <sub>min.</sub> ) | 287      | 332      |
| $E_{\text{elst.}}^{\text{SAPT (1)}}$       | –39.3350                                                                       | –26.4585                            | –11.5892 | –5.6835 | –212.2520                                                                      | –151.2490                           | –97.8784 | –46.9350 |
| $E_{\text{exch.}}^{\text{SAPT (1)}}$       | 55.0872                                                                        | 28.7655                             | 5.2057   | 0.8048  | 337.6787                                                                       | 195.5275                            | 92.0015  | 21.5863  |
| $E_{\text{disp.}}^{\text{SAPT (2)}}$       | –20.4710                                                                       | –10.6282                            | –2.4709  | –0.7624 | –214.4968                                                                      | –122.3079                           | –58.2948 | –15.4007 |
| $E_{\text{disp.-exch.}}^{\text{SAPT (2)}}$ | 14.0993                                                                        | 6.6182                              | 0.9120   | 0.1162  | 136.7242                                                                       | 76.2138                             | 33.8666  | 7.1074   |
| $E_{\text{ind.}}^{\text{SAPT (2)}}$        | –28.1217                                                                       | –19.5323                            | –7.6629  | –3.2283 | –86.0319                                                                       | –60.5658                            | –37.7111 | –15.7542 |
| $E_{\text{ind.-exch.}}^{\text{SAPT (2)}}$  | 5.3224                                                                         | 3.1275                              | 0.7230   | 0.1423  | 22.0241                                                                        | 14.6017                             | 8.0481   | 2.4037   |
| $E_{\delta(\text{HF})}^{\text{SAPT}}$      | –5.6397                                                                        | –2.7518                             | –0.4214  | –0.0545 | –62.2469                                                                       | –35.2823                            | –16.1671 | –3.3206  |
| $E_{\text{total}}$                         | –19.0585                                                                       | –20.8594                            | –15.3035 | –8.6654 | –78.6006                                                                       | –83.0616                            | –76.1350 | –50.3132 |
| $\Delta E(\text{CC})$                      | –17.4561                                                                       | –19.7275                            | –15.6749 | –8.0781 | –75.7832                                                                       | –85.6417                            | –78.6820 | –50.8790 |

six pages in total

Figure S1. The MP2/aTZ minimum of the benzofuran:formaldehyde adduct.

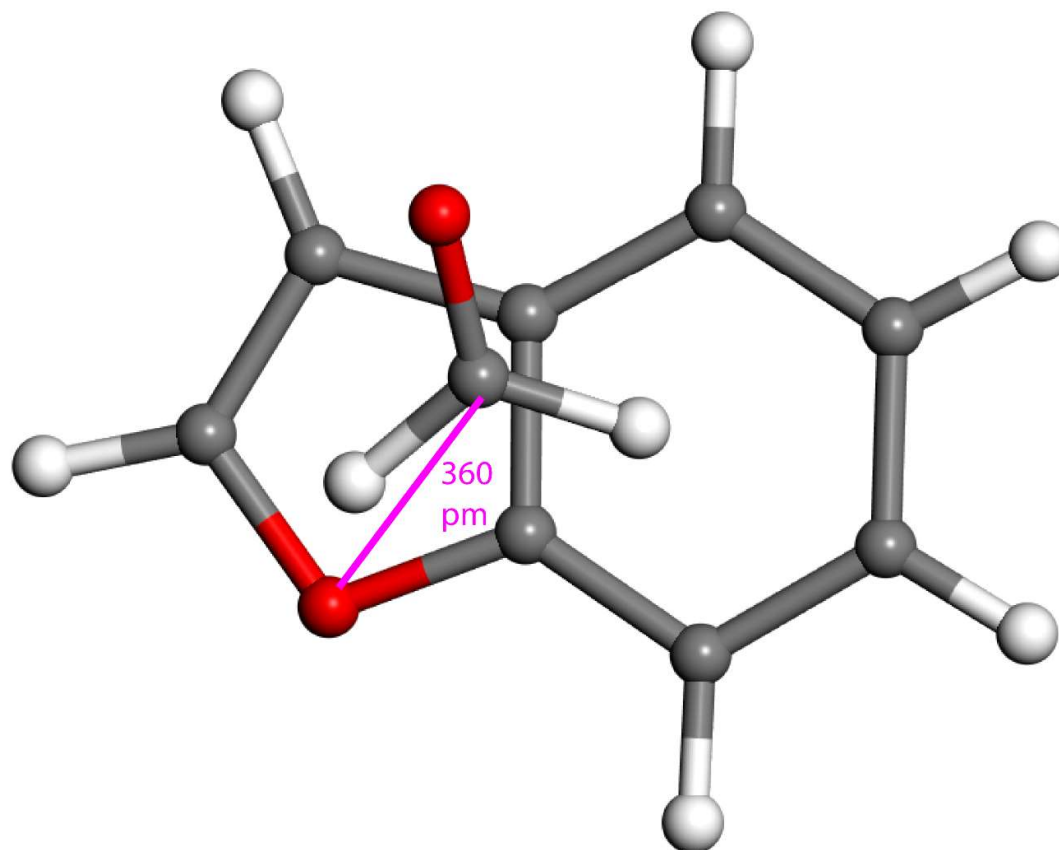

six pages in total

Table S4. Results of the EDA calculations performed at the B3LYP-D3/QZ4P level. Respective terms are: Pauli repulsion,  $\Delta E_{\text{Pauli}}$  (see Eq. 13 of ref. [55]); the electrostatic interaction,  $\Delta E_{\text{elstat}}$  (see Eq. 11 of ref. [55]); the orbital interaction,  $\Delta E_{\text{oi}}$  (see Eq. 22 of ref. [55]); the empirical dispersion correction,  $\Delta E_{\text{D3}}$  (see ref. [34]);  $\Delta E(\text{EDA}) = \Delta E_{\text{Pauli}} + \Delta E_{\text{elstat}} + \Delta E_{\text{oi}} + \Delta E_{\text{D3}}$ ; the basis set superposition error correction,  $\Delta E(\text{BSSE})$ ; and  $\Delta E(\text{DFT1}) = \Delta E(\text{EDA}) + \Delta E(\text{BSSE})$ . Also shown is  $\Delta E(\text{CC})$  as in Table S3.

| interaction<br>energy<br>term | model of the C–H...O interaction;<br><i>R</i> is specified right below (in pm) |                                     |        |       | model of the O–H...O interaction;<br><i>R</i> is specified right below (in pm) |                                     |         |        |
|-------------------------------|--------------------------------------------------------------------------------|-------------------------------------|--------|-------|--------------------------------------------------------------------------------|-------------------------------------|---------|--------|
|                               | 320                                                                            | 339<br>( <i>R</i> <sub>min.</sub> ) | 379    | 441   | 247                                                                            | 269<br>( <i>R</i> <sub>min.</sub> ) | 287     | 332    |
| $\Delta E_{\text{Pauli}}$     | 46.75                                                                          | 26.49                               | 4.16   | 1.01  | 319.07                                                                         | 178.82                              | 95.37   | 9.03   |
| $\Delta E_{\text{elstat}}$    | −39.61                                                                         | −28.46                              | −11.44 | −5.56 | −214.77                                                                        | −152.53                             | −107.58 | −34.95 |
| $\Delta E_{\text{oi}}$        | −16.37                                                                         | −10.44                              | −2.66  | −0.87 | −174.46                                                                        | −106.47                             | −63.80  | −10.68 |
| $\Delta E_{\text{D3}}$        | −10.61                                                                         | −9.97                               | −5.41  | −2.67 | −11.63                                                                         | −11.04                              | −10.31  | −6.87  |
| $\Delta E(\text{EDA})$        | −19.84                                                                         | −22.38                              | −15.36 | −8.09 | −81.80                                                                         | −91.22                              | −86.32  | −43.47 |
| $\Delta E(\text{BSSE})$       | −0.30                                                                          | −0.24                               | −0.14  | −0.06 | −0.84                                                                          | −0.70                               | −0.58   | −0.30  |
| $\Delta E(\text{DFT1})$       | −20.04                                                                         | −22.62                              | −15.50 | −8.15 | −82.64                                                                         | −91.92                              | −86.90  | −43.77 |
| $\Delta E(\text{CC})$         | −17.46                                                                         | −19.73                              | −15.67 | −8.08 | −75.78                                                                         | −85.64                              | −78.68  | −50.88 |

six pages in total

Figure S2. The dependence of interaction energies from Table S4 upon the intermonomer separation  $R$  in acrylic acid dimers that model the C–H···O hydrogen bonding.

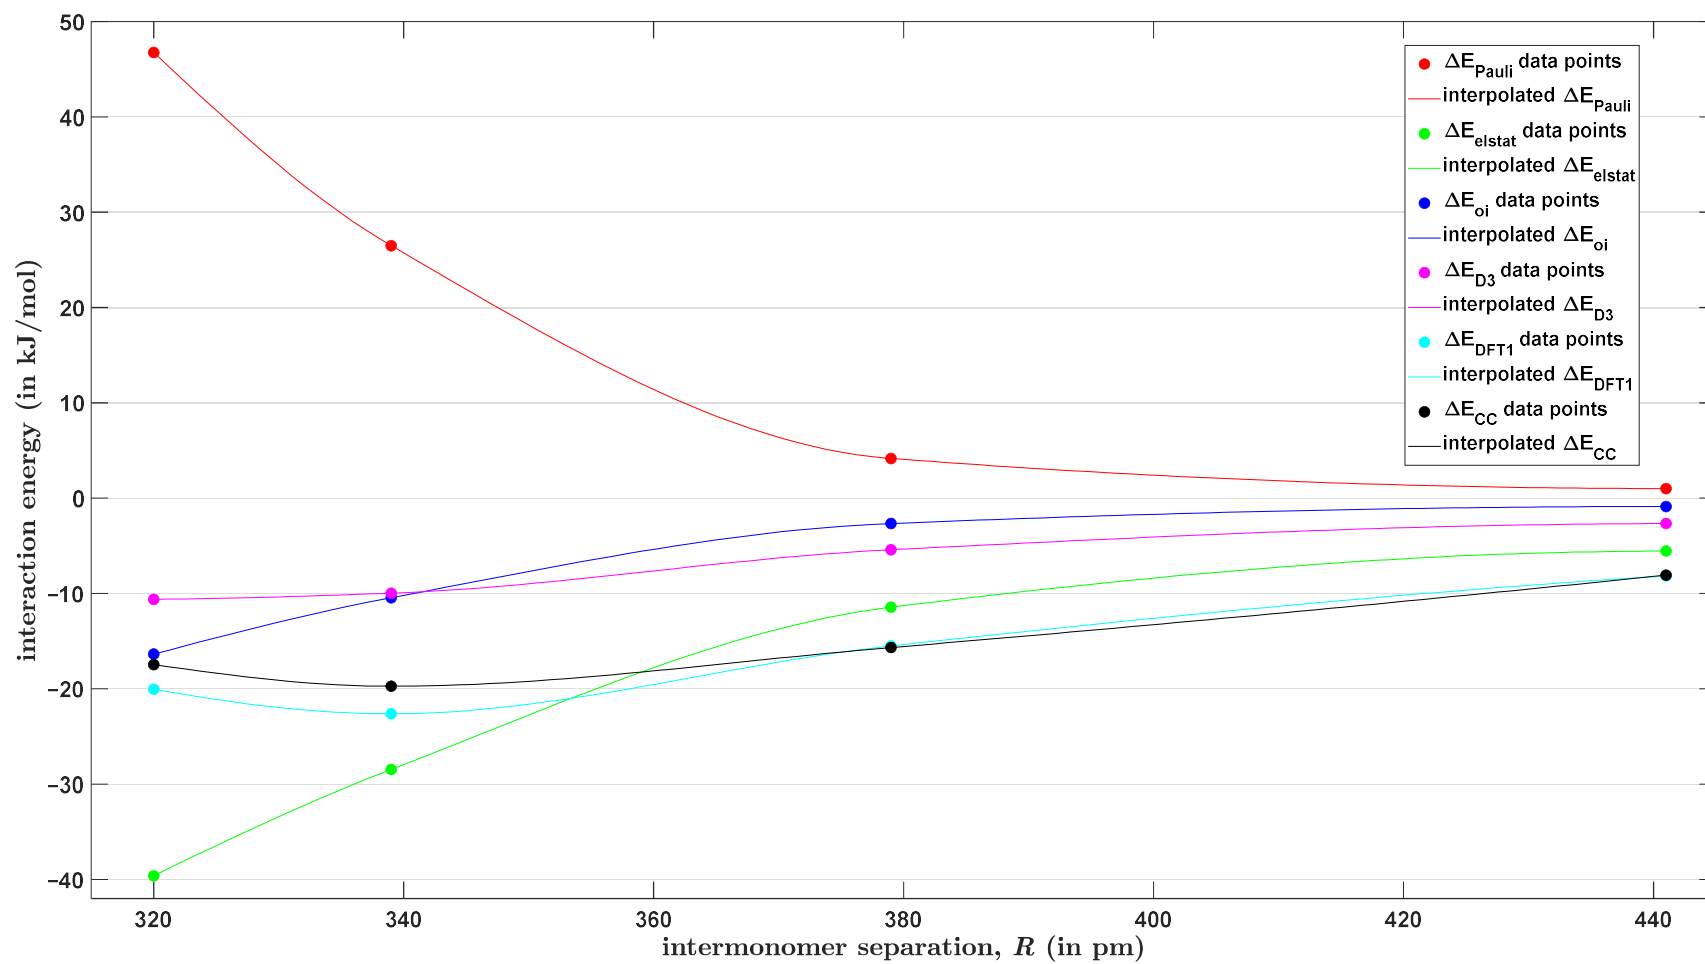

Supplement: s1 [file s1]
